# Supplementary material for: An easy and accessible water-soluble sensor for the distinctive fluorescence detection of Zn2+ and Al3+ ions
Source: Royal Society of Chemistry journal article supplement (doi:10.1039/c5ra15126k), 2015-01-01
Supplement: c5ra15126k1.pdf [file c5ra15126k1.pdf]

## Supplementary information

# An Easy and Accessible Water-soluble Sensor for the Distinctive Fluorescence Detection of Zn<sup>2+</sup> and Al<sup>3+</sup> ions†

### Experimental

#### Materials and instrumentation

Salicylaldehyde and 2-(2-Aminoethylamino)ethanol were obtained from aladdin-reagent. The solvents were used as received without further purification. Tap water was obtained from tap faucet (Nanshan District, Shenzhen, China. Sampling time: 14:00 on August 18th, 2015). Stock solutions of various cations (1 mM) were prepared using nitrate salts and chloride salts of analytical grade. Stock solution of SA (1 mM) was prepared in Tris buffer (10 mM, pH = 7.0) or tap water. Test solutions were prepared by placing 150  $\mu$ L of the probe stock solution into cuvettes, adding an appropriate aliquot of various metal ions solutions, and diluting the solution to 3 mL with Tris buffer (10 mM, pH = 7.0) or tap water. UV-vis spectra were recorded with SCINCO S-4100. A HORIBA Jobin Yvon SPEX spectro fluorimeter was used for fluorescence measurements. The excitation wavelength was 310 nm and the spectra were recorded in the range 330-600 nm. Both <sup>1</sup>H NMR (400 MHz) and <sup>13</sup>C NMR spectra (100 MHz) of the compound were recorded on a Burkert Dpx spectrometer in CDCl<sub>3</sub> with tetramethylsilane as the internal standard. The high-resolution mass spectrum was performed on Bruker APEX IV.

#### Synthesis

A ethyl acetate solution (10.0 mL) of 2-(2-Aminoethylamino)ethanol (1.04 g, 10 mmol) was added dropwise to the solution (10 mL) of salicylaldehyde (1.22 g, 10 mmol) in methanol under stirring. Then the mixture was stirred for 3 h at room temperature to afford a yellow residue (the target product SA). SA was obtained via filtration and dried under vacuum in a 93% yield.

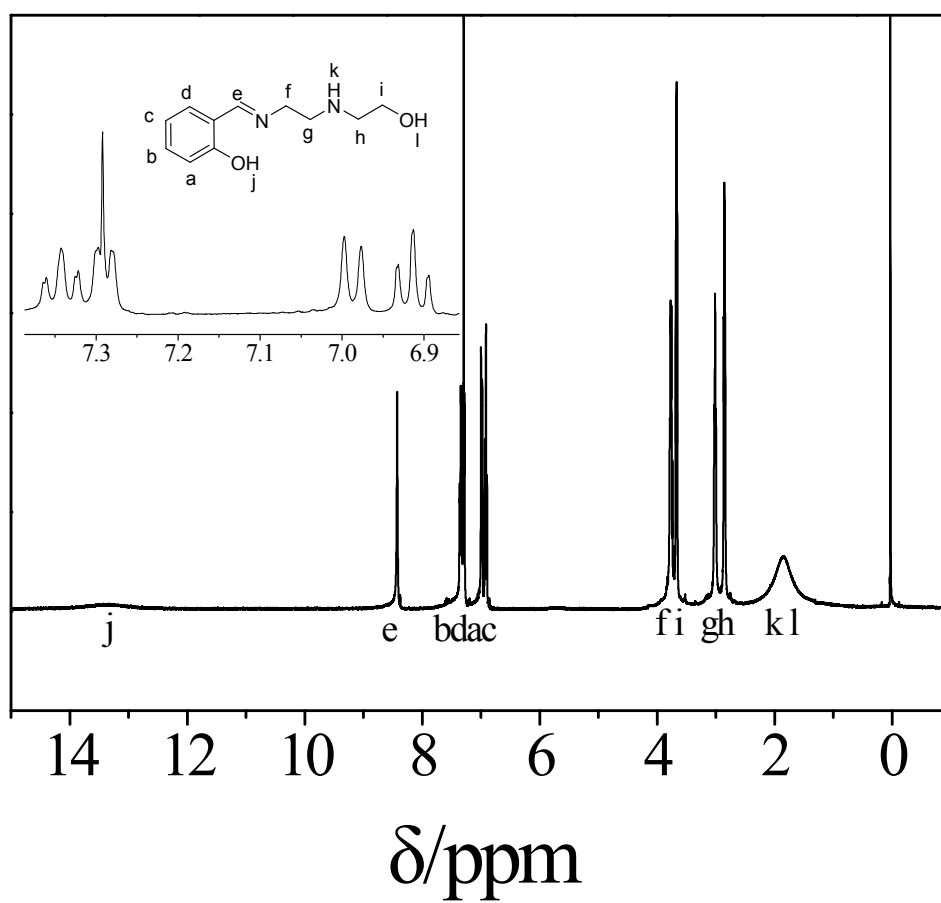

**Fig. S1**  $^1\text{H}$  NMR spectrum of SA.  $^1\text{H}$  NMR (400 MHz,  $\text{CDCl}_3$ )  $\delta$ : 13.38 (br, 1H), 8.43 (s, 1H), 7.34 (t,  $J = 8.5$  Hz, 1H), 7.29 (d,  $J = 6.3$  Hz, 1H), 6.99 (d,  $J = 8.2$  Hz, 1H), 6.91 (t,  $J = 7.4$  Hz, 1H), 3.82 – 3.73 (m, 2H), 3.71 – 3.64 (m, 2H), 3.06 – 2.97 (m, 2H), 2.92 – 2.81 (m, 2H), 1.87 (br, 2H).

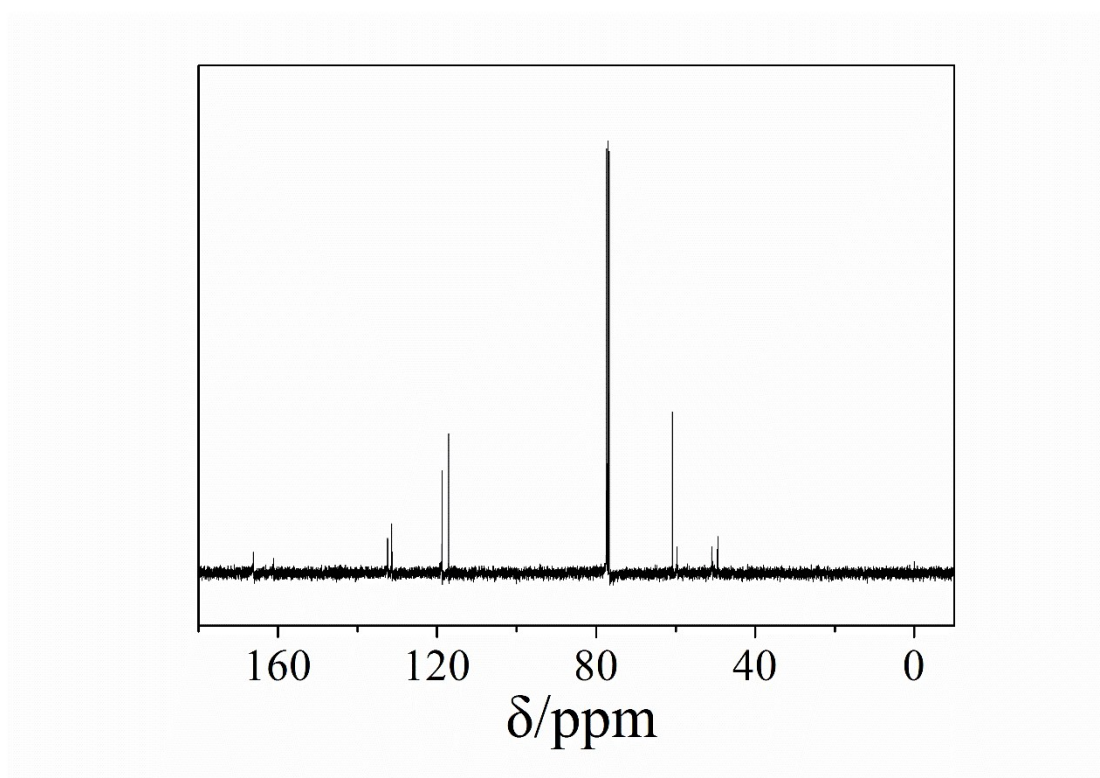

**Fig. S2** <sup>13</sup>C NMR spectrum of SA. <sup>13</sup>C NMR (100 MHz, CDCl<sub>3</sub>) δ: 166.20, 161.16, 132.42, 131.37, 118.71, 117.08, 60.86, 59.70, 50.88, 49.43.

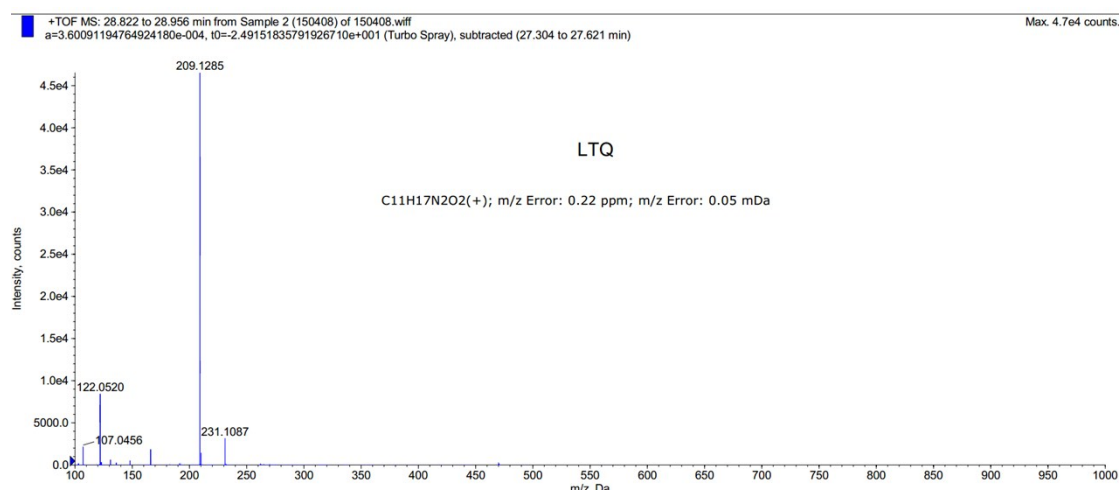

**Fig. S3** High-resolution mass spectrum of SA. HRMS (ESI): calcd for C<sub>11</sub>H<sub>17</sub>N<sub>2</sub>O<sub>2</sub> [SA+H<sup>+</sup>]<sup>+</sup>: 209.1285; found: 209.1285.

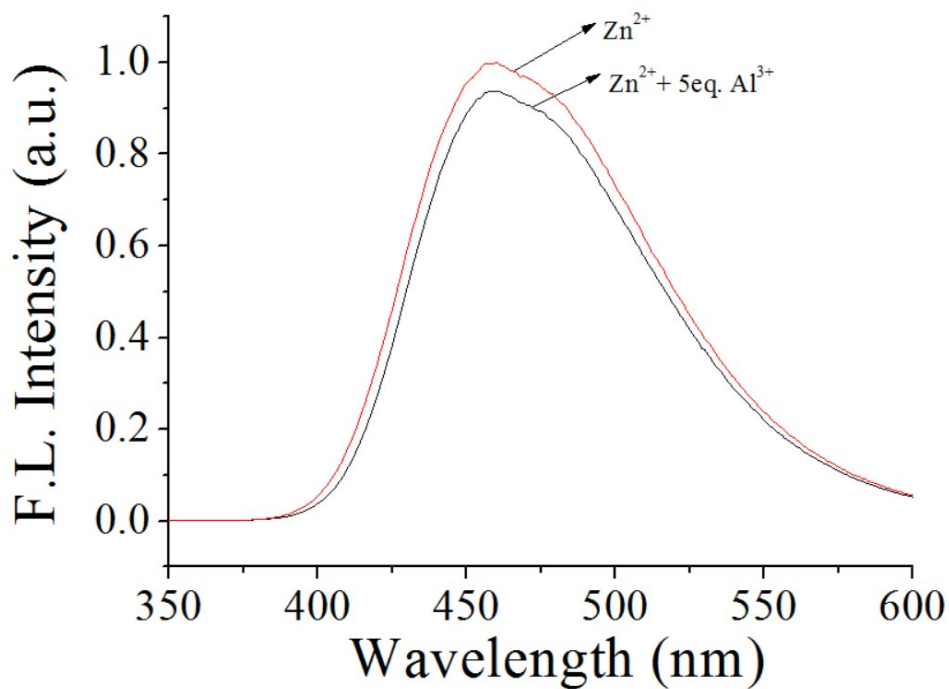

**Fig. S4** Fluorescence spectra of SA (50  $\mu$ M) in HAC-NaAc buffer (60 mM, pH=6,  $\omega_{NH_4F}$ =0.02,  $\omega_{tartaric\ acid}$ =0.07). The red line represents the fluorescence spectra in the presence of  $Zn^{2+}$ ; the black line represents the fluorescence spectra in the presence of  $Zn^{2+}$  and 5eq.  $Al^{3+}$ .

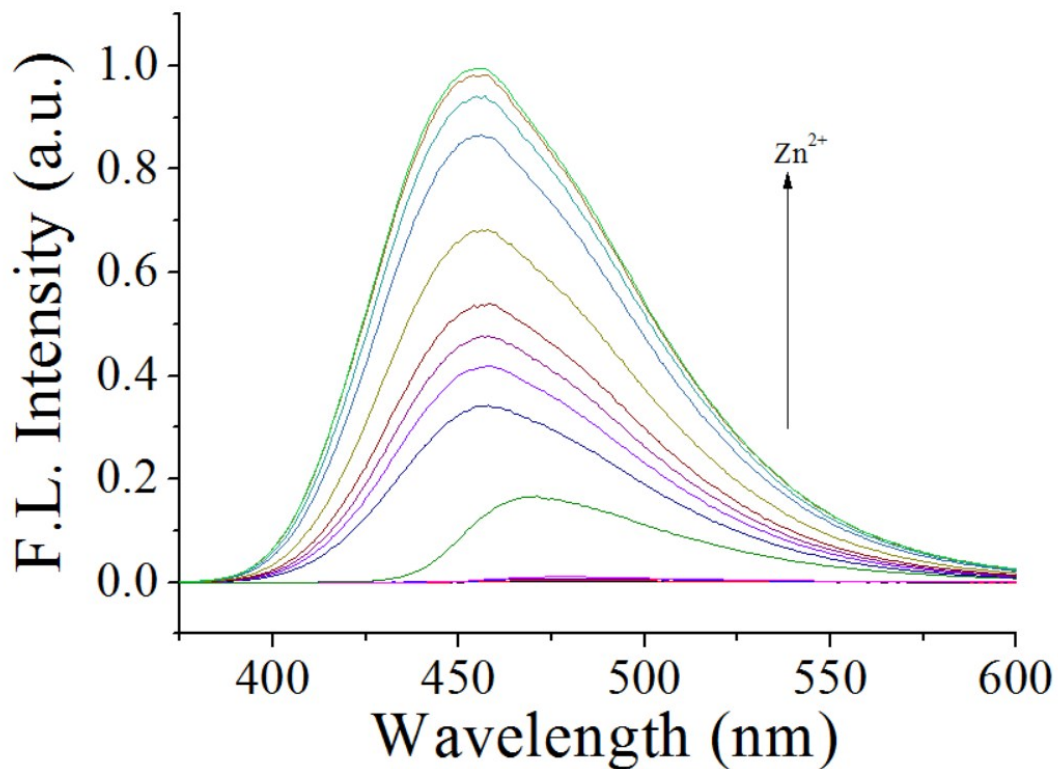

**Fig. S5** Fluorescence spectra of SA (50  $\mu$ M) in the presence of increasing concentrations of  $Zn^{2+}$  in HAC-NaAc buffer (60 mM, pH=6,  $\omega_{NH_4F}$ =0.02,  $\omega_{tartaric\ acid}$ =0.07).

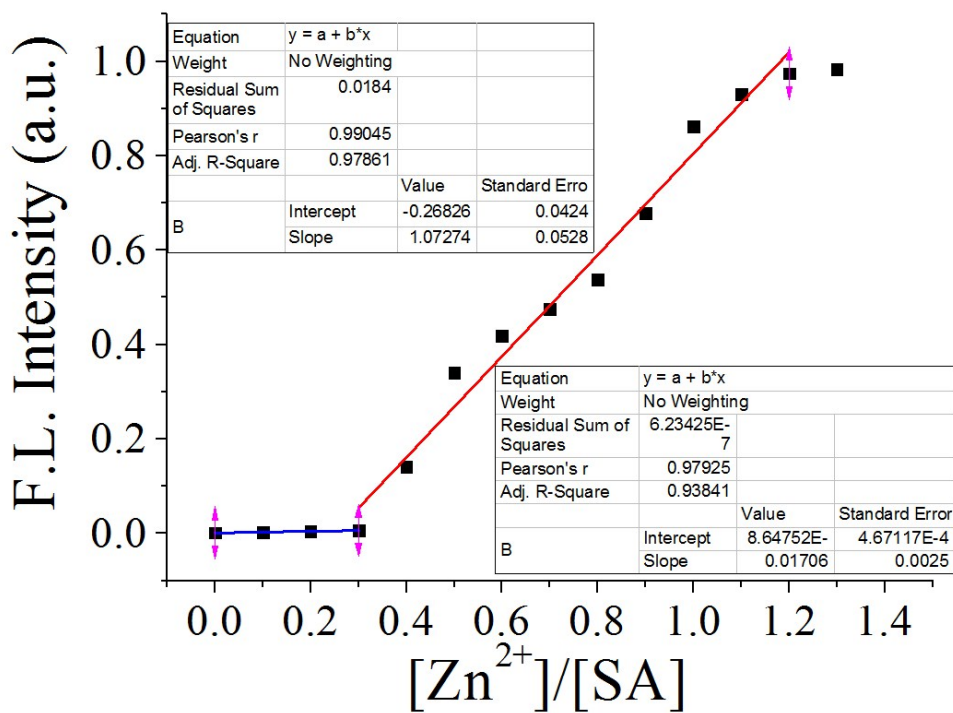

**Fig. S6** Fluorescence intensity at 458 nm as a function of  $[Zn^{2+}]/[SA]$ .

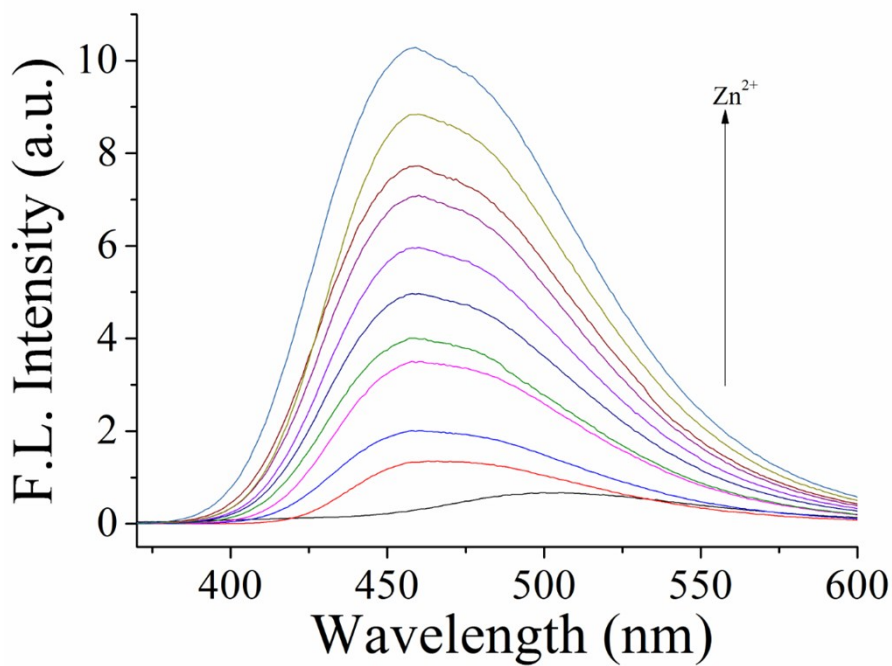

**Fig. S7** Fluorescence spectra of SA (50  $\mu$ M) in the presence of increasing concentrations of  $Zn^{2+}$  in tap water.

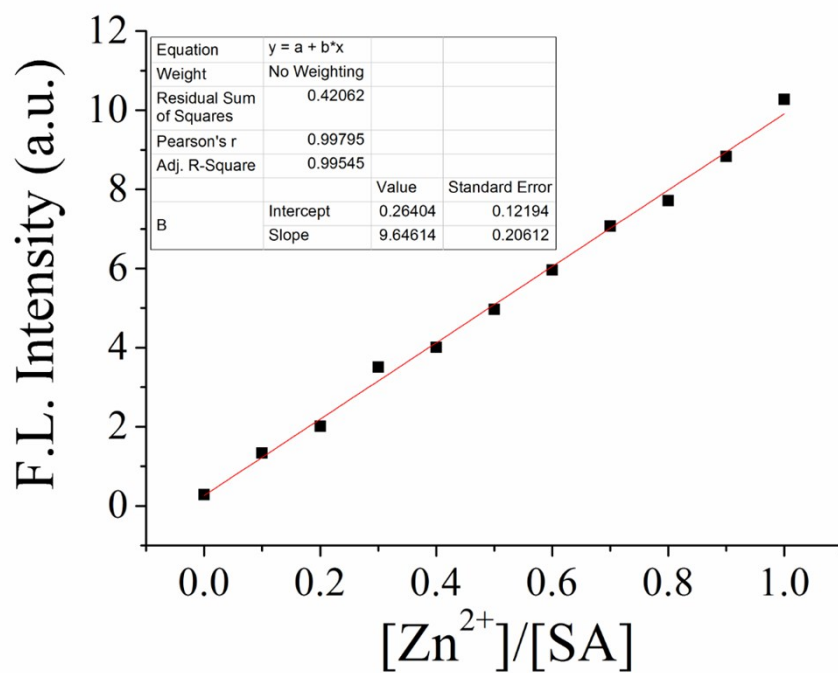

**Fig. S8** Fluorescence intensity at 458 nm as a function of  $[Zn^{2+}]/[SA]$ .

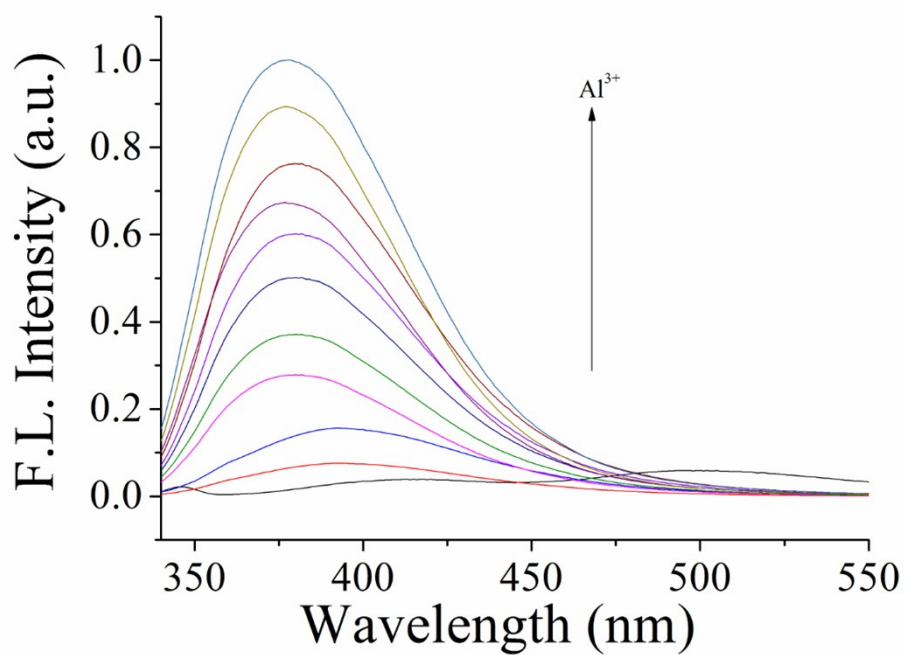

**Fig. S9** Fluorescence spectra of SA (50  $\mu$ M) in the presence of increasing concentrations of  $Al^{3+}$  in tap water.

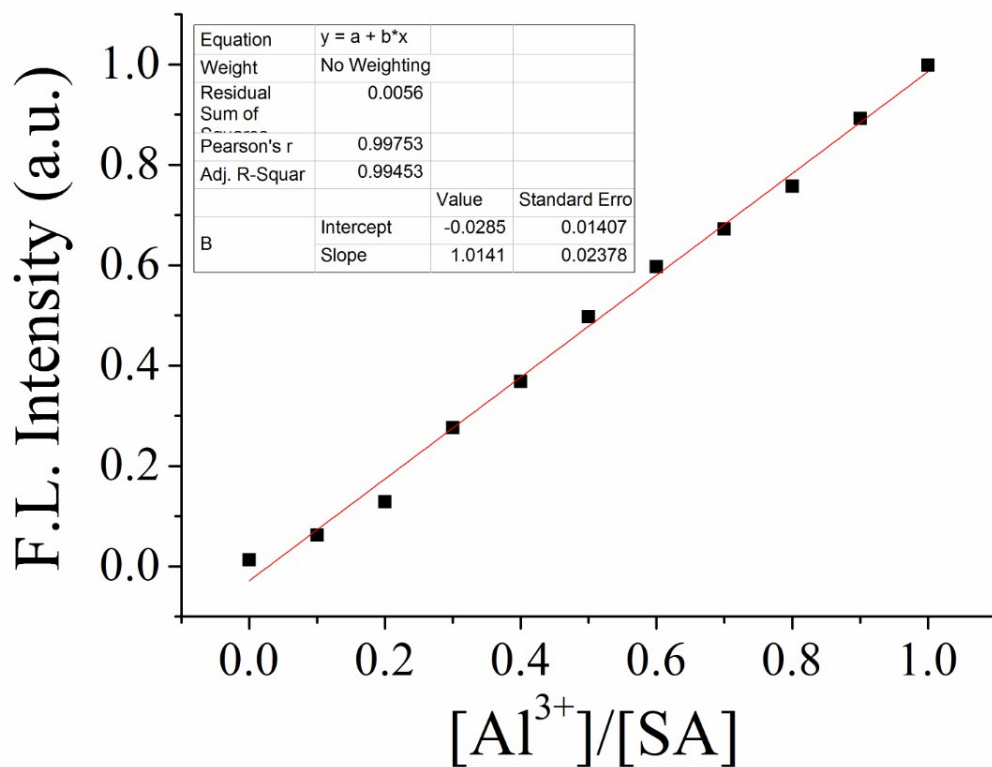

**Fig. S10** Fluorescence intensity at 376 nm as a function of  $[Al^{3+}] / [SA]$ .

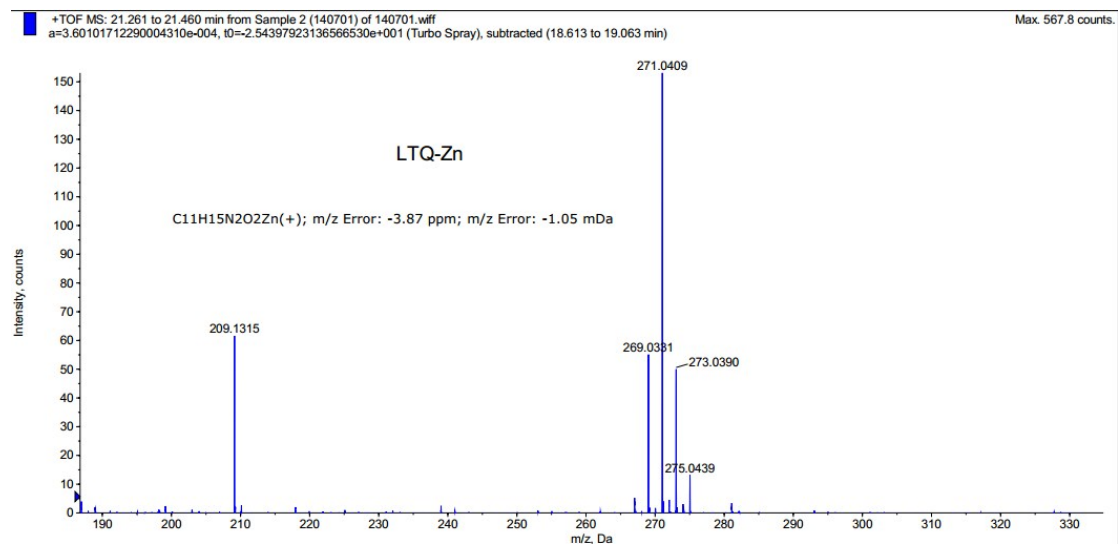

**Fig. S11** High-resolution mass spectrum of SA-Zn<sup>2+</sup> complex. HRMS (ESI): calcd for C<sub>11</sub>H<sub>15</sub>N<sub>2</sub>O<sub>2</sub>Zn [SA+Zn<sup>2+</sup>-H<sup>+</sup>]<sup>+</sup>: 271.0420; found: 271.0409.



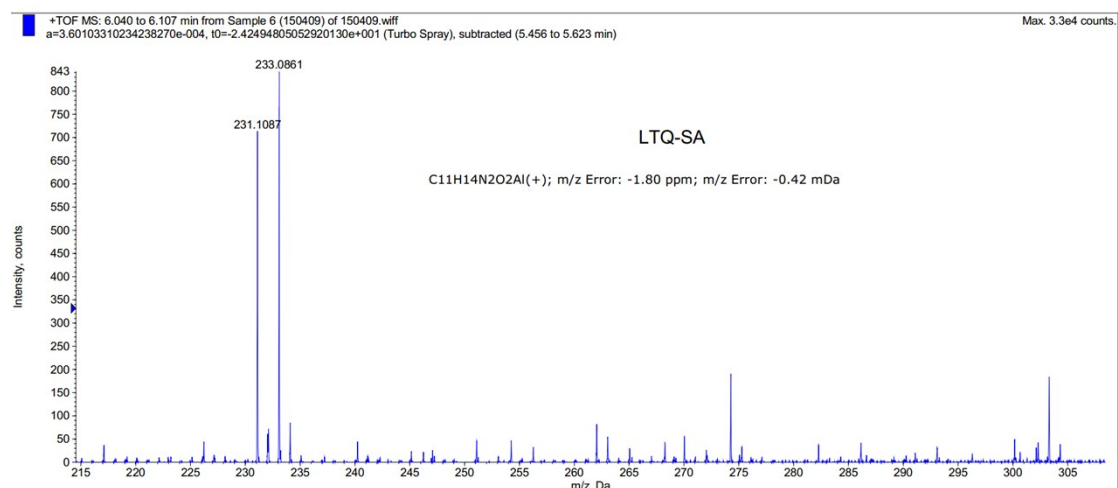

**Fig. S12** High-resolution mass spectrum of SA- $Al^{3+}$  complex. HRMS (ESI): calcd for  $C_{11}H_{14}N_2O_2Al [SA+Al^{3+}-2H^+]^+$ : 233.0865; found: 233.0861.

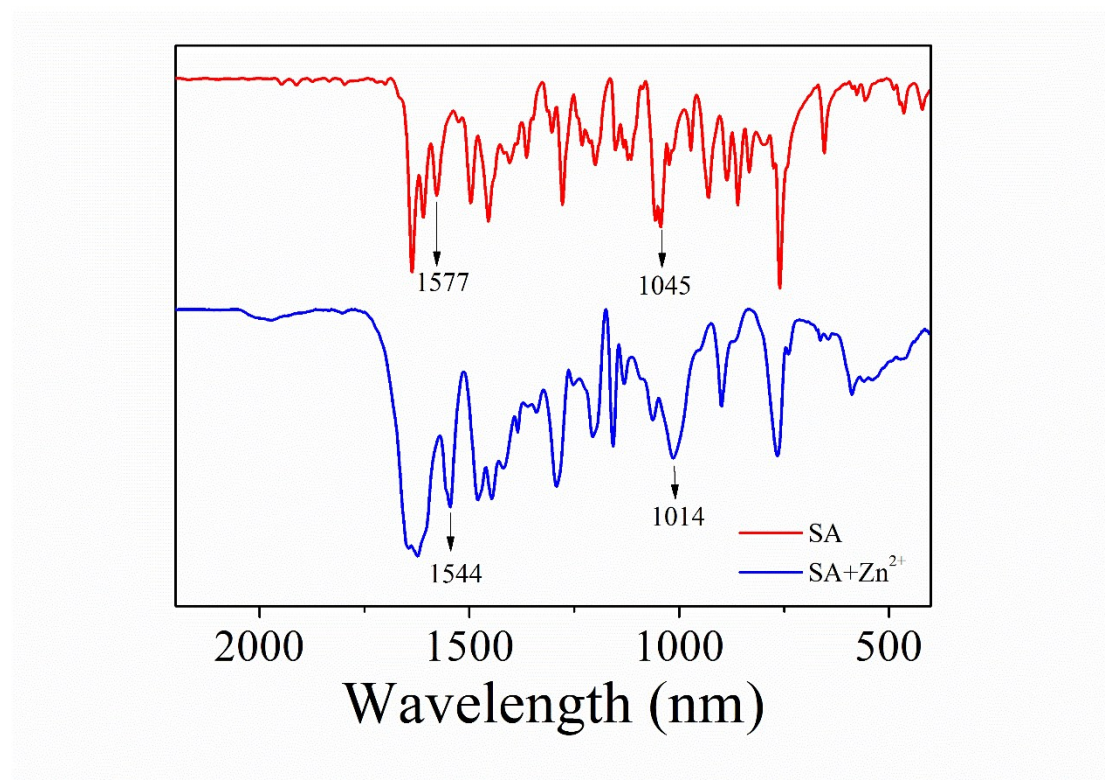

**Fig. S13** FT-IR spectra of SA and SA- $Zn^{2+}$  complex.



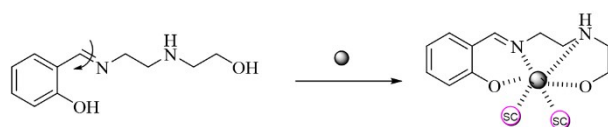

 Denotes:  $Zn^{2+}$  or  $Al^{3+}$

 Denotes: Solution Circumstance

..... Denotes: Interaction between metal ions and other particles, which could provide lone pair electrons, such as anion, solvent molecules, ect.

**Fig. S14** Probable binding mode of SA with metal ion
